# Supplementary material
Source: publisher figshare collection journal article supplement (https://acs.figshare.com/ndownloader/files/15460460)
Supplement: Supplementary file 1 [file 15460460]

**Supplementary Table 1. Raw scores of the cognitive tests of all subjects.**

|                              | Control (n=87) | aMCI (n=68)    | P-value            |
|------------------------------|----------------|----------------|--------------------|
| Episodic memory              |                |                |                    |
| AVLT-20min DR                | 7.31 ± 1.94    | 2.57 ± 1.36    | 0.000 <sup>a</sup> |
| LMT-20min DR                 | 4.33 ± 2.19    | 2.10 ± 1.84    | 0.000 <sup>a</sup> |
| ROCFT-20min DR               | 19.26 ± 5.54   | 13.06 ± 6.35   | 0.000 <sup>a</sup> |
| Information processing speed |                |                |                    |
| DSST                         | 40.15 ± 9.85   | 31.60 ± 8.01   | 0.000 <sup>a</sup> |
| TMT-A                        | 64.63 ± 19.23  | 80.40 ± 26.40  | 0.000 <sup>a</sup> |
| Stroop-A                     | 26.83 ± 5.46   | 29.88 ± 8.21   | 0.006 <sup>a</sup> |
| Stroop-B                     | 39.68 ± 10.55  | 44.19 ± 12.26  | 0.015 <sup>a</sup> |
| Executive function           |                |                |                    |
| VFT-animal                   | 19.90 ± 5.04   | 16.75 ± 4.75   | 0.000 <sup>a</sup> |
| VFT-supermarket goods        | 24.91 ± 6.09   | 21.51 ± 5.56   | 0.000 <sup>a</sup> |
| DST-backward                 | 4.80 ± 1.40    | 4.04 ± 1.18    | 0.000 <sup>a</sup> |
| TMT-B                        | 167.94 ± 61.46 | 213.49 ± 94.09 | 0.000 <sup>a</sup> |
| Stroop-C                     | 78.18 ± 21.15  | 90.51 ± 32.31  | 0.005 <sup>a</sup> |
| Similarity                   | 19.07 ± 2.80   | 15.72 ± 4.17   | 0.000 <sup>a</sup> |
| Visuospatial function        |                |                |                    |
| CDT                          | 8.99 ± 1.04    | 8.34 ± 1.19    | 0.000 <sup>a</sup> |
| ROCFT                        | 34.47 ± 3.30   | 34.19 ± 2.92   | 0.582 <sup>a</sup> |

Data are presented as the mean ± stand deviation (SD).

Abbreviations: aMCI, amnesic mild cognitive impairment; AVLT-20min DR, Auditory Verbal Learning Test-20-minute delayed recall; LMT-20min DR, Logical Memory Test-20-minute delayed recall; CFT-20min DR, Rey-Osterrieth Complex Figure Test-20-minute delayed recall; DSST, Digital Symbol Substitution Test; TMT-A, Trail Making Test-A; Stroop, Stroop Color and Word Test; VFT-animal, Verbal Fluency Test of animals; VFT-supermarket goods, Verbal Fluency Test of supermarket goods; DST, Digit Span Test; TMT-B, Trail Making Test-B; Similarity, Semantic Similarity Test; CDT, Clock Drawing Test; ROCFT, Rey-Osterrieth Complex Figure Test.

<sup>a</sup> P-values were obtained by t tests.

**Supplementary Table 2.  $\beta$  Coefficients from linear regression models for the relationship of the global cognitive function, four cognitive domains, total grey matter and hippocampus volumes with plasma indicators in aMCI patients.**

| Indicators   | Model 1       | Model 2       | Model 3 | Model 4 | Model 5 | Model 6       | Model 7       |
|--------------|---------------|---------------|---------|---------|---------|---------------|---------------|
|              | $\beta$       | $\beta$       | $\beta$ | $\beta$ | $\beta$ | $\beta$       | $\beta$       |
| A $\beta$ 40 | -0.042        | <b>-0.314</b> | -0.003  | -0.173  | 0.123   | -0.147        | -0.148        |
| A $\beta$ 42 | <b>-0.271</b> | 0.015         | 0.055   | -0.154  | 0.056   | -0.077        | -0.109        |
| T-tau        | <b>-0.366</b> | -0.056        | -0.153  | -0.069  | -0.086  | <b>-0.213</b> | -0.126        |
| NFL          | -0.072        | -0.206        | 0.173   | -0.048  | -0.081  | -0.114        | <b>-0.229</b> |

Abbreviations: AD, Alzheimer's disease; aMCI, amnesic mild cognitive impairment; A $\beta$ , amyloid- $\beta$ ; T-tau, total tau; NFL, neurofilament light.

NOTE. The dependent variable of Model 1 was Mini-Mental State Examination raw score (represented the global cognitive function); the dependent variables of Model 2, Model 3, 4 and 5 were Z scores of episodic memory, information processing speed, executive function, and visuospatial function respectively (represented four major cognitive domains' function) respectively; the dependent variable of Model 6 and 7 were intracranial grey matter and hippocampus volumes respectively. All models were adjusted for age, gender and education years.

Bolded values indicate  $p < 0.05$ .

**Supplementary Table 3. The accuracy of 16 models from different machine learning algorithms for individual identification of aMCI.**

| Groups | Model inputs                        | LR     | SVC    | DT     | NN     |
|--------|-------------------------------------|--------|--------|--------|--------|
| 1      | Basic model                         | 65.81% | 66.45% | 65.56% | 55.48% |
| 2      | A $\beta$ 40                        | 64.52% | 67.74% | 69.03% | 67.74% |
| 3      | A $\beta$ 42                        | 68.39% | 70.32% | 67.44% | 69.03% |
| 4      | T-tau                               | 65.16% | 67.10% | 58.12% | 58.06% |
| 5      | NFL                                 | 64.52% | 69.68% | 62.75% | 61.94% |
| 6      | A $\beta$ 40 + A $\beta$ 42         | 68.39% | 69.03% | 66.91% | 66.45% |
| 7      | A $\beta$ 40 + t-tau                | 63.23% | 66.45% | 64.03% | 63.87% |
| 8      | A $\beta$ 40 + NFL                  | 66.45% | 70.97% | 64.65% | 69.03% |
| 9      | A $\beta$ 42 + t-tau                | 67.74% | 69.68% | 65.65% | 68.39% |
| 10     | A $\beta$ 42 + NFL                  | 70.97% | 74.19% | 72.96% | 73.55% |
| 11     | NFL + t-tau                         | 64.52% | 69.03% | 60.85% | 61.29% |
| 12     | A $\beta$ 40 + A $\beta$ 42 + t-tau | 69.68% | 69.03% | 63.92% | 66.45% |
| 13     | A $\beta$ 40 + A $\beta$ 42 + NFL   | 70.32% | 72.90% | 69.82% | 70.32% |
| 14     | A $\beta$ 40 + t-tau + NFL          | 67.10% | 73.55% | 63.59% | 70.97% |
| 15     | A $\beta$ 42 + t-tau + NFL          | 70.32% | 72.26% | 72.50% | 74.19% |
| 16     | A $\beta$ 40+A $\beta$ 42+t-tau+NFL | 70.32% | 72.26% | 69.03% | 72.26% |

Abbreviations: aMCI, amnesic mild cognitive impairment; LR, logistics regression; SVC, support vector classifier; DT, decision tree; NN, neural network; A $\beta$ , amyloid- $\beta$ ; T-tau, total tau; NFL, neurofilament light.

NOTE. The basic model represents the accuracy of clinical features (age, gender and education years) and hippocampal volume without any plasma indicators. The rest models added any combinations of plasma indicators on the basic model.

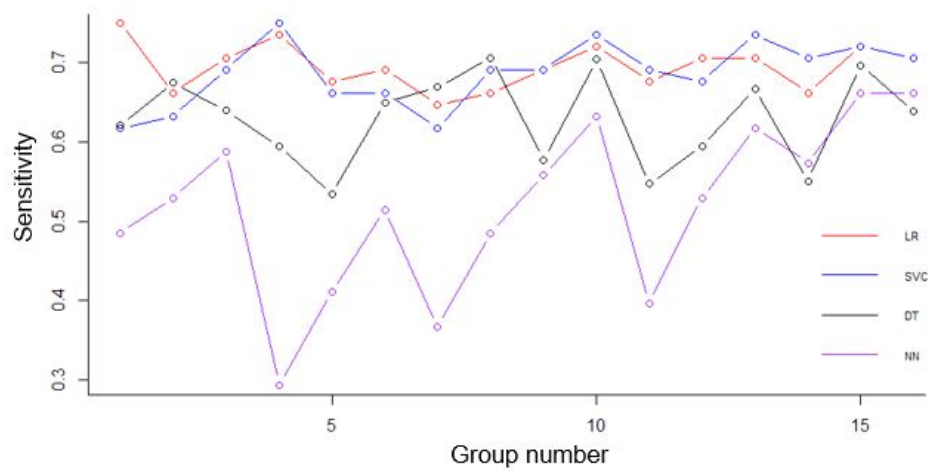

**Supplementary Figure 1. The scatterplot of the sensitivity of 16 models using four machine learning algorithms.**

Abbreviations: LR, logistics regression; SVC, support vector classifier; DT, decision tree; NN, neural network.

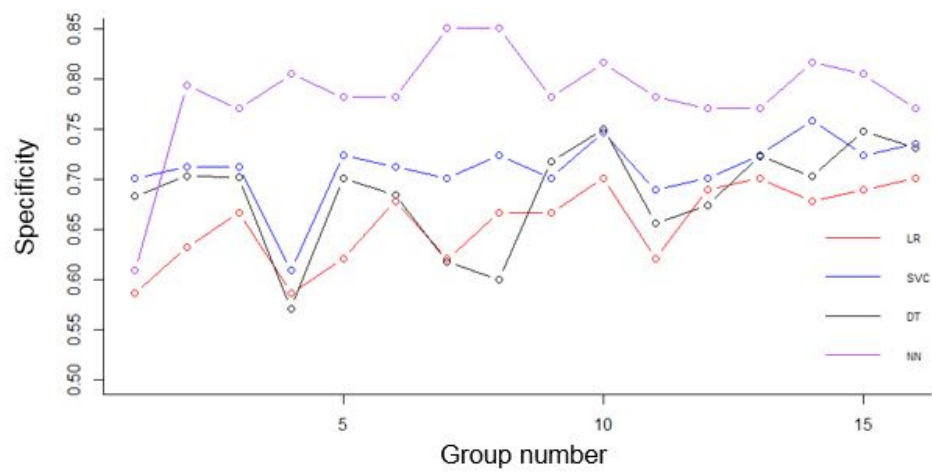

**Supplementary Figure 2. The scatterplot of the specificity of 16 models using four machine learning algorithms.**

Abbreviations: LR, logistics regression; SVC, support vector classifier; DT, decision tree; NN, neural network.
